1 Mapping Evidence on Road Safety Information Management Systems in Sub-Saharan

2 Africa: Scoping Review Protocol

3

4

5 Shemsedin Amme<sup>1</sup> , Sheka Shemsi Seid<sup>1</sup> , Mekonen Bogale<sup>2</sup> , Demuma Amdisa<sup>1</sup> ,

6 Abdusemed Husen<sup>1</sup> , Getachew Tilahun<sup>3</sup> , Nega Jibat<sup>3</sup> , Getachew Mamo<sup>4</sup>

7

8

9 <sup>1</sup>Institute of Health, Jimma University, Jimma, Ethiopia

10 <sup>2</sup>College of Business and Economics, Jimma University, Jimma, Ethiopia

11 <sup>3</sup>College of Social Science and Humanities, Jimma University, Jimma, Ethiopia

12 <sup>4</sup>Jimma Institute of Technology, Jimma University, Jimma, Ethiopia

13

14 **Corresponding:** Shemsedin Amme Ibro

15 Email: [shemsedin.ibro@ju.edu.et](mailto:shemsedin.ibro@ju.edu.et)

16

17

18

19

20

21

## 22 Abstract

23 **Background:** Road safety information management systems (RSIMS) play a vital role in improving  
24 road safety in sub-Saharan Africa (SSA) by providing reliable and timely data and information for  
25 evidence-based decision making. However, little is known about RSIMS in SSA.

26 **Objective:** The objective of this scoping review is to map the extent and type of evidence on RSIMS  
27 in Sub-Saharan Africa.

28 **Inclusion criteria:** This review will include sources that report on the application of RSIMS in SSA.  
29 The source of information that have considered the use of electronic data systems or software  
30 related to any aspects of the road safety management will be included irrespective of their designs  
31 or methods. Sources that focused on other populations, concepts, or context will be excluded.

32 **Methods:** A comprehensive search of published studies in electronic databases such as Scopus,  
33 PubMed, Embase, PubMed, RSKC, ARSO, Lens, and in the sources of grey literature will be carried  
34 out to identify relevant sources of information reported in English from 2019 onwards. A scoping  
35 review will be performed based on the JBI frameworks using Parsifal platform. Reviewers will  
36 independently screen the sources for eligibility, extract data using a JBI-adapted tool, analyze data  
37 using descriptive statistics and thematic analysis. The results will be presented in tables, figures,  
38 diagrams, and a narrative summary.

39 **Registration details:** This protocol for this scoping review has been registered on OSF,  
40 <https://osf.io/6e2mx/>.

41

## 42 Introduction

43 Road traffic accidents (RTAs) are one of the major threats to humanity, casting a long shadow on the  
44 health and socioeconomic well-being of the global community[1]. According to the World Health  
45 Organization (WHO), in 2023, an estimated 1.2 million people died from RTAs, while 30–50 million  
46 suffered non-fatal injuries and permanent disabilities[2]. Low- and middle-income countries (LMICs)  
47 are disproportionately bearing the devastating human and economic impacts of RTAs, accounting for  
48 93% of global deaths and costing 3% of their annual gross domestic product (GDP) [1,3].

49 Sub-Saharan Africa (SSA) represents the highest RTA fatality rates in the world, accounting for 19  
50 deaths per 100,000 population[4], despite the lowest number of the world’s vehicles[5]. However,  
51 the burden of RTAs in SSA is underreported due to paucity of data[6]. Nevertheless, the burden is  
52 expected to increase by double more than a fold by 2030, due to rapid urbanization, population  
53 growth, motorization, and inadequate road infrastructure unless there is strong preventive  
54 measure[5]. In addition to the devastating human costs, SSA also bear the brunt of the RTA’s impacts  
55 on socioeconomic development, as the young and most productive parts of the society are  
56 disproportionately affected by road accidents[4]. Moreover, lack of strong and quality healthcare  
57 adds an additional layer of complexity to the problems, making RTA major public health problem in  
58 the region[6].

59 To address this soaring burden of RTAs, the WHO proposed safe system approach - a holistic  
60 strategy known as “Decade of Action for Road Safety 2021-2030”, across the world including in  
61 SSA[7]. Establishing data system is one of the strategies identified by this global decade of action,  
62 indicating the indispensable role of data [7]. The road safety data have crucial role in awareness  
63 raising, characterizing the accident, diagnosing its causes, and thereby to act as evidence and inform  
64 policy and program interventions, resource allocation, and monitoring and evaluating progress [8,9].  
65 However, road safety data often relies on patchwork of data sources that include incomplete or  
66 inaccessible in SSA due to multifaceted challenges that hindering the understanding of the true

67 magnitude of the problem, its consequences, decision making, and progress toward improvements  
68 [10–18].

69 Like other SSA countries, Ethiopia also faces a serious road safety problem, and one of the four  
70 countries accounting for more than half of the RTA fatalities in the region of SSA. According to the  
71 WHO report, in 2016, the estimated RTA fatalities was 27,326, with death rate 26.7 per 100000  
72 population, and total of 409,890 serious non-fatal injuries. The report also indicates that the RTA  
73 cause devastating the economic loss in the country, as the 60% of the accidents occurring in the  
74 economically productive age groups (15 - 64 years), as well as causing more than \$6.5 billion  
75 estimated total costs of fatalities and serious injuries[19]. The total annual GDP loses was estimated  
76 to be 8.8% of the GDP [19], which is more than twice of the country's annual healthcare expenditure  
77 (4.2% of GDP) [19]. However, this WHO's statistics variates with the official government's, and  
78 Global burden of diseases (GBD) reports, which reported the road fatalities 4,352 and 9,639 for the  
79 same year, 2016, indicating limitations in data collection and dissemination[19]. Moreover, the  
80 safety data in the country's rising the issues of quality and accuracy, as it relies on the manually  
81 processed paper works [20]. As a result, evidence have been indicating that the accurate burden of  
82 the RTA in Ethiopia is underreported and estimated to be at least double of what actually  
83 reported[13,20,21]. For instance, in their study Abegaz(2014) identified a significant underreporting  
84 and discrepancies between the police and hospital accident data in the country[20]. Ethiopia has  
85 taken some steps to address its road safety challenges including developing a national road safety  
86 strategy (2021-2030) [22], and slight reduction has been observed in the magnitude and death rates,  
87 while the aim is to reduce by 50% by 2030 [21–24]. Though, the country recognized the need for  
88 strengthening road safety data as one of priority areas, efforts yet remain to bring changes towards  
89 reliable and timely data and information management system [13,20].

90 Road safety data/information management system (RSIMS) is one of the key components of an  
91 effective road safety system suggested to overcome the challenges of poor road accident records

92 and information management in each country across the world [25]. RSIMS is an electronic system  
93 that collects, stores, analyses and disseminates data and information on road safety issues [26–28].  
94 Moreover, it plays essential roles in improving road safety through providing timely and evidence-  
95 based insight and information for decision-makers, practitioners, researchers, and the public[9,29].  
96 Such systems can provide timely and accurate data that can serve several purposes including for  
97 awareness creation and advocacy, policy formulation, planning of program or project interventions,  
98 resource allocation, and monitoring and evaluation[9,27,29]. Despite the dire burden of RTA, gaps  
99 with data, and importance of RSIMS in improving road safety, there is a lack of comprehensive and  
100 systematic evidence on the current state, experience, and challenges with RSIMS implementation in  
101 SSA. As a result of this, road safety data issues and opportunities for improvement in most of the  
102 countries in the region of SSA, including in Ethiopia are not well understood or documented. Most of  
103 the previous studies are primary studies focused on the specific aspects of crash data such as  
104 sources, accuracy, quality, and geospatial distribution, while no review addressed entire spectrum  
105 of, and regional perspectives on the RSIMS issues and solutions exclusively in SSA[14,17,18,28,30–  
106 34].

107 Given this background, there is a need for a comprehensive and systematic overview of the  
108 literature on RSIMS in SSA, with a focus on Ethiopia. This will identify the evidence and knowledge  
109 gaps on RSIMS in the region, and inform future research, policy, and practice on road safety and RTA  
110 prevention. Therefore, this scoping review aims to fill this knowledge gap by mapping and  
111 synthesizing the existing literature on RSIMS in SSA, with an emphasis on Ethiopia. We will review  
112 both peer-reviewed and grey literature that address the technical, operational, or policy aspects of  
113 RSIMS in SSA, to examine the conceptualization, development, and implementation of RSIMS to  
114 improve road safety data and information in the region.

## 115 Objective

116 The aim of this scoping review is to provide a comprehensive overview of the extent and state of  
117 knowledge on RSIMS in SSA. By systematically exploring and mapping the current state of knowledge  
118 on RSIMS, this review will inform further research and strategies for improving road safety outcomes  
119 in the region, with emphasis on Ethiopia.

## 120 Research Questions

121 This scoping review aimed to answer this primary research question: What is the current state of  
122 evidence on RSIMS in SSA, and its practical and policy implications to Ethiopia?

123 Specifically, this scoping review will address the following four sub-research questions:

- 124 1. What are the core concepts in, characteristics, and components of RSIMS in SSA, and how  
125 are they implemented and utilized across different levels (e.g., accident scene, health  
126 facility, traffic police, national)?
- 127 2. What are the benefits, facilitators, and challenges for implementing RSIMS in SSA  
128 technological, institutional, data quality, and what factors influence their effectiveness and  
129 sustainability?
- 130 3. How RSIMS tailored to address the unique context of SSA countries (e.g., infrastructure, data  
131 collection, user needs), ensuring their relevance and effectiveness?
- 132 4. What are the best practices, lessons learned, and recommendations for improving RSIMS in  
133 SSA, and what are the implications for practice and policy in Ethiopia?

## 134 Inclusion Criteria

135 The inclusion criteria for this scoping review are derived from research questions and objectives  
136 using a population, concept, and context (PCC) framework.

137 **Population:**

138 This review will include sources that report on or involve any road safety stakeholders including road  
139 users, healthcare providers, law enforcement officials, practitioners, researchers, and policymakers,  
140 to understand RSIMS from various perspectives and levels.

141 **Concept:**

142 Source will be included if it reported on the development or applications of electronic data systems  
143 or software related to any aspects of the road safety management. This includes any specific digital  
144 technology and applications relevant to RSIMS, aimed at data acquisition, storage, processing,  
145 retrieval, and dissemination of information on road safety. The source should report desired  
146 outcomes such as system components (including functionalities, data sources, incident information,  
147 indicators, platforms), addressing development and utilization process, as well as benefits,  
148 feasibility, and challenges of implementation. The review will not consider sources that not reporting  
149 on or addressing any of these aspects.

150 **Context:**

151 The sources that reporting on the utilization of RSIMS at any level, including accident scenes, health  
152 facilities, traffic police, and national/regional levels, and engaging stakeholders at each level will be  
153 included to ensure the comprehensive coverage of RSIMS implementation in different contexts. To  
154 be considered in the review, the source should report on or conducted in any SSA country or region,  
155 based on the on the World Bank definitions for low-income and lower-middle-income economies in  
156 SSA [35]. Sources that not specific to any country or region in SSA will be excluded, due to lack of  
157 generalizability of the findings to the contexts of the region.

158 **Source Type:**

159 To ensure broaden scope that capture diverse information sources, this review will consider both  
160 published and grey sources that reporting empirical or non-empirical evidence relevant to RSIMS,

161 regardless of design or methodology they used. Specifically, primary studies including quantitative,  
162 qualitative, and mixed method studies are eligible sources of information. In addition, review articles  
163 including systematic and scoping reviews, as well as narrative, descriptive and explanatory literature  
164 reviews will also be included depending on the research question. Furthermore, reports, guidelines,  
165 conference proceedings, dissertations, informed perspectives, policy recommendations, texts and  
166 opinions papers will be considered for inclusion, if proving evidence relevant to the research  
167 questions. This review will exclude study protocols, opinion pieces, editorials, letters, news articles,  
168 and abstracts of articles that are not available in full texts as they do not provide sufficient  
169 information for this study.

170 The timeframe of including sources is that, if they published or reported in the last five years, after  
171 2019 to ensure capturing relevant and current information. The source will be eligible if reported in  
172 English considering that English is a widely used research language in SSA and spoken by the  
173 research team.

## 174 **Methods and Analysis**

175 This scoping will be guided by Johanna Briggs Institute (JBI) frameworks[36], Preferred Reporting  
176 Items for Systematic Reviews and Meta-analyses extension for scoping review (PRISMA-ScR)  
177 guideline[37] which are appropriate for conducting a systematic and transparent scoping review.  
178 The protocol for this review is registered on OSF[38]. This review will be commenced by March 2024  
179 and accomplished within eight months. By implementing thorough and transparent methodology  
180 this review will addresses its proposed objectives.

### 181 **Search Strategy:**

182 A three-stage search strategy will be employed to locate relevant sources of information in  
183 electronic databases and sources of grey literature.

184 Stage 1: Database Search: Database search for published studies involve three steps involving a  
185 preliminary search of information, stage of the development of full search terms, and full search in  
186 targeted electronic databases. First, preliminary searches in limited databases including Scopus and  
187 PubMed will be done using free text search forms to identify relevant articles and abstracts. This will  
188 enable to identify relevant keywords and indexing terms, that inform the development initial  
189 comprehensive search strategy incorporating indexing terms such as "traffic accidents," "road safety  
190 information systems," and "Sub-Saharan Africa". Moreover, developed initial comprehensive search  
191 strategy will be entered to selected databases, and PubReMiner platform [39], to understand the  
192 quality of search results, identify and characterize the commonly used keywords, their synonyms,  
193 and index terms relevant to the research questions.

194 The identified relevant keywords and indexing terms will be refined and combined using appropriate  
195 Boolean operators (AND/OR), and appropriate truncation (?/\*). Then, developed search terms will  
196 be further evaluated for any syntactical errors, quality of search results, and diagrammatically to  
197 visually understand relationship between the concepts in the query and to further refine using  
198 online platforms including the Searchrefinery - SR Accelerator Tool [40], and 2DSearch platform [41].  
199 Moreover, the sensitivity and specificity of the search strategy will be evaluated to ensure it  
200 capturing sources relevant to the research questions and excluding irrelevant studies as possible.  
201 The search strategy /queries for selected databases for supplemented to this protocol in the  
202 Appendix I.

203 Before the final search in the databases, full search strategy will be translated and piloted to each  
204 targeted database according to its syntax and functionality. Translation of the full search strategy to  
205 databases will be facilitated by online tools such as Polyglot SR Accelerator Tool[42], and 2DSearch  
206 platform[41], otherwise manually customized for databases not supported by these tools. The  
207 targeted databases to retrieve published studies will include Scopus, Embase, PubMed, The Lens,  
208 Transport Research International Documentation (TRID), Africa-Wide Information (AWI), WHO

209 library, Road Safety Knowledge Centre (RSKC), African Journals Online (AJOL), African Road Safety  
 210 Observatory (ARSO), European Road Safety Observatory (ERSO), and Using Digital Innovation and  
 211 Technology to Advance Road Safety (UNITAR) (Table 1). Additional relevant databases will be  
 212 considered based on the quality of the results, and research questions if required. Final full search of  
 213 information in the targeted databases using a piloted and customized search strategy will be  
 214 conducted. The language and publication year filters will be employed, for focusing on relevant,  
 215 recent sources. In addition, advanced search functionalities in databases such as proximity  
 216 operators, truncation wildcards, and field searching will be employed to refine results.

217 *Table 1: Target databases, search providers, and links to search providers.*

| Database                                                    | Search Provider                        | Link to Search Provider                                                                                                                                           |
|-------------------------------------------------------------|----------------------------------------|-------------------------------------------------------------------------------------------------------------------------------------------------------------------|
| Scopus                                                      | Elsevier                               | <a href="https://www.scopus.com/">https://www.scopus.com/</a>                                                                                                     |
| EMBASE                                                      | Elsevier                               | <a href="https://www.embase.com/">https://www.embase.com/</a>                                                                                                     |
| PubMed (MEDLINE)                                            | National Library of<br>Medicine (NLM)  | <a href="https://pubmed.ncbi.nlm.nih.gov/">https://pubmed.ncbi.nlm.nih.gov/</a>                                                                                   |
| The Lens                                                    | Cambia                                 | <a href="https://www.lens.org/search/">https://www.lens.org/search/</a>                                                                                           |
| Semantic Scholar                                            | Semanticscholar                        | <a href="https://www.semanticscholar.org/">https://www.semanticscholar.org/</a>                                                                                   |
| Transport Research<br>International<br>Documentation (TRID) | Transportation Research<br>Board (TRB) | <a href="https://trid.trb.org/">https://trid.trb.org/</a>                                                                                                         |
| African Journals Online<br>(AJOL)                           | African Journals OnLine<br>(AJOL)      | <a href="https://www.ajol.info/">https://www.ajol.info/</a>                                                                                                       |
| Africa-Wide Information<br>(AWI)                            | EBSCOhost                              | <a href="https://www.ebsco.com/products/research-databases/africa-wide-information">https://www.ebsco.com/products/research-databases/africa-wide-information</a> |

|                                                                         |                                             |                                                                                                                                                                                                                                     |
|-------------------------------------------------------------------------|---------------------------------------------|-------------------------------------------------------------------------------------------------------------------------------------------------------------------------------------------------------------------------------------|
| Road Safety Knowledge Centre (RSKC)                                     | Road Safety GB                              | <a href="https://roadsafetyknowledgecentre.org.uk/">https://roadsafetyknowledgecentre.org.uk/</a>                                                                                                                                   |
| African Road Safety Observatory (ARSO)                                  | African Union Commission (AUC) and partners | <a href="https://www.roadsafetyobservatory.africa/">https://www.roadsafetyobservatory.africa/</a>                                                                                                                                   |
| European Road Safety Observatory (ERSO)                                 | European Commission                         | <a href="https://ec.europa.eu/transport/road_safety/specialist/erso_en">https://ec.europa.eu/transport/road_safety/specialist/erso_en</a>                                                                                           |
| Using Digital Innovation and Technology to Advance Road Safety (UNITAR) | UNITAR                                      | <a href="https://www.unitar.org/about/news-stories/news/using-digital-innovation-and-technology-advance-road-safety">https://www.unitar.org/about/news-stories/news/using-digital-innovation-and-technology-advance-road-safety</a> |
| WHO global health library                                               | World Health Organization (WHO)             | <a href="https://www.who.int/library/">https://www.who.int/library/</a>                                                                                                                                                             |
| Research4Life/HINARI                                                    | Research4Life                               | <a href="https://portal.research4life.org/">https://portal.research4life.org/</a>                                                                                                                                                   |

218 Stage 2: Reference List Search: The reference lists of the included studies will be systematically  
219 searched using online platform Citation Chaser tool to identify relevant backward references and  
220 forward citations. This will be further supplemented by hand searches for potentially missed  
221 sources. In addition, databases like Connected Papers, Researchrabbit, ResearchGate, and Google  
222 Scholar Alerts for other relevant sources of evidence will be used for additional studies (Table 2).  
223 Moreover, the authors of the sources will be contacted to request the missing or additional data for  
224 clarification (unclear information), where required. The outcomes of the authors contact will be  
225 documented and reported in the review report.

226 Stage 3: Grey Literature Search: Electronic databases such as Google Scholar, EBSCO dissertation,  
227 and Worldwidescience will be used for unpublished studies, conference proceedings, thesis and  
228 dissertations. In addition, grey literature such as reports, policy recommendation, and government

229 documents, will be identified through targeted searches of relevant websites and organizational  
230 repositories including World Road Safety Association (PIARC), World Health Organization, World  
231 Bank, African Development Bank, United Nations Economic Commission for Africa, and Sub-Saharan  
232 Africa Transport Policy Program. Language and Publication Year restriction will be considered based  
233 on the inclusion criteria.

234 *Table 2: Sources of published and unpublished literature and link databases*

| Database/source         | Link to databases                                                                                                                                       |
|-------------------------|---------------------------------------------------------------------------------------------------------------------------------------------------------|
| Google Scholar          | <a href="https://scholar.google.com/">https://scholar.google.com/</a>                                                                                   |
| EBSCO open dissertation | <a href="https://www.ebsco.com/products/research-databases/open-dissertations">https://www.ebsco.com/products/research-databases/open-dissertations</a> |
| Worldwidescience        | <a href="https://www.worldwidescience.org/">https://www.worldwidescience.org/</a>                                                                       |
| Researchrabbit          | <a href="https://researchrabbit.ai/">https://researchrabbit.ai/</a>                                                                                     |
| Connected Papers        | <a href="https://www.connectedpapers.com/">https://www.connectedpapers.com/</a>                                                                         |
| ResearchGate            | <a href="https://www.researchgate.net/">https://www.researchgate.net/</a>                                                                               |
| Google                  | <a href="https://www.google.com/">https://www.google.com/</a>                                                                                           |

235 [Selection of Sources:](#)

236 Following the search, full citations of identified sources will be imported to and collated using Zotero  
237 version 6.0.30 (Corporation for Digital Scholarship, Virginia, USA)[43]. This will be followed by  
238 deduplication using online platform the Deduplicator SR-Accelerator Too[44]. A two-stage screening  
239 process will be employed to select eligible sources against inclusion criteria, to ensure objectivity  
240 and minimizes bias. First, title and abstract screening will be done by importing the deduplicated  
241 citations of identified sources to The Screnator SR-Accelerator Tool [44], a web platform for  
242 screening. This will be done by two independent reviewers through assessing and screening against  
243 the inclusion criteria.

244 Next, full-text of the potentially eligible sources will be retrieved, and their citation details imported  
245 into the Parsifal review platform - a web-based tool for systematic reviews in software  
246 engineering[45]. Then, full text will be assessed in detail against the inclusion criteria by two or more  
247 independent reviewers. For the sources excluded at a full text screening stage, reasons for exclusion  
248 will be recorded and reported in the scoping review for transparency. Any disagreements between  
249 reviewers at each stage of screening will be resolved through discussion or involving a third  
250 reviewer.

251 The results of the search and screening process will be documented and reported in full scoping  
252 review, and presented using the Preferred Reporting Items for Systematic Reviews and Meta-  
253 analyses extension for scoping review (PRISMA-ScR) flow diagram[37].

#### 254 [Data Extraction:](#)

255 Data extraction will be done using a JBI guideline-adapted tool [36], on Parsifal review platform[45],  
256 by independent reviewers. Extracted data will include specific details about the bibliographic  
257 information, population, concept, context, methods, and key findings related to the research  
258 questions from the included articles. We adapted the JBI data extraction tool [36] for scoping  
259 reviews to suit the specific objectives and questions of our review by adding the one data field for  
260 implications /recommendations, while modifying one field on the intervention characteristics and  
261 comparison groups, as concept/intervention. Detailed data extraction tool fields and definitions  
262 supplemented in Appendix II of this protocol .

263

264 The data extraction fields will include the following categorized structured coding scheme:

265 Specific data fields and categories will be further defined based on the research questions and  
266 anticipated themes to ensure targeted data collection achieved. The data extraction tool will be

267 piloted by the reviewers on sample of sources before actual data extraction. Modification and  
268 revision will be done as required based on pilot test.

269 Data extraction fields will be coded to online review Parsifal platform[45], to facilitate efficient and  
270 standardized data collection. The data and information extracted from each source will be assessed  
271 for accuracy and validated against the original source, and any errors or discrepancies corrected or  
272 clarified as needed. Any disagreements that arise between the reviewers will be resolved through  
273 discussion, or with an additional third reviewer. In addition, authors of papers will be contacted to  
274 request any missing or additional data, where required.

275 The quality assessment will not be formally assessed, as this is not a requirement for scoping  
276 reviews. However, any limitations or strengths of the sources that may affect the interpretation or  
277 generalization of the findings will be acknowledged and discussed in the review.

#### 278 [Data Synthesis and Presentation:](#)

279 Extracted data will be analysed using descriptive statistics and thematic analysis to summarize and  
280 synthesize information extracted from the included sources. The descriptive statistics will be used to  
281 provide summarized information overview of the characteristics and distribution of the sources and  
282 their findings according to key variables such as year of publication, country, type, and design. The  
283 thematic analysis will be used to identify the code schemes developed in the data extraction stage,  
284 and organize them using the key themes and subthemes that emerge from the data, and according  
285 to the research questions on Microsoft office (Microsoft Office, Microsoft, Redmond, Washington  
286 USA), using DocTools Add-ins (DoocTools ExtractData 1.5) [46]. Inter-rater variability of the codes  
287 and themes will be assessed ensure reliability.

288 Findings will be presented in a clear and concise manner, utilizing tables, figures, diagrams, and a  
289 comprehensive narrative summary that clearly addresses the research questions and provides  
290 actionable insights. This will include a table summarizing the characteristics and findings of each

291 source, a figure showing the PRISMA flow diagram of the screening and selection process, and a  
292 diagram depicting the thematic map of the key themes and categories from the thematic analysis.  
293 Moreover, a narrative summary will be used to present and discuss the findings, providing a  
294 comprehensive and coherent description and interpretation of the results. This will be organized and  
295 presented using the themes including type and key components; the context and implementation;  
296 benefits and effects; challenges and facilitators; and the recommendations and implications to  
297 provide holistic understanding of the current state of knowledge on RSIMS in SSA.

## 298 **Dissemination Plan**

299 The report of this review will be prepared following the structure and content recommended by the  
300 JBI Manual for scoping review[36] and the PRISMA-ScR reporting guidelines [37]. The finding will be  
301 disseminated to relevant stakeholders, including policymakers, researchers, practitioners, and  
302 communities using different channels such as publication on a peer-reviewed journals and  
303 presentation on the scientific conference that focuses on road safety or public health in Africa.  
304 Moreover, the findings will be used to guide the future studies, where this scoping of the review is  
305 part of the evidence and knowledge mapping.

## 306 **Expected Outcomes**

307 This scoping review will contribute significantly to the ongoing efforts to improve RSIMS by providing  
308 a comprehensive overview of the current state of evidence on RSIMS in SSA, identifying the key gaps  
309 and challenges in its implementation and utilization, map potential solutions and recommendations  
310 for improvements, and inform practical and policy strategies for enhancing road safety in Ethiopia  
311 and other SSA countries.

## 312 **Funding**

313 No funds were received for this review.

## 314 Author's contributions

315 All authors contributed equally to conceiving and writing this protocol. Authors SAI, SSS, MB, and  
316 GM developed the research questions and inclusion criteria of this protocol. SAI, NJ, and SSS  
317 designed the search strategy, and study selection plan, while AH, GT, and DA designed and tested  
318 data extraction tool, and data analysis and presentation plan.

## 319 Competing of interest

320 The authors have declared that no competing interests exist.

## 321 References

322

323 1. WHO. Road safety [Internet]. Road traffic injuries2023 [cited 2024 Jan 30];Available from:  
324 [https://www.who.int/health-topics/road-safety#tab=tab\\_1](https://www.who.int/health-topics/road-safety#tab=tab_1)

325 2. WHO. Road traffic injuries [Internet]. Fact sheets2023 [cited 2024 Jan 30];Available from:  
326 <https://www.who.int/news-room/fact-sheets/detail/road-traffic-injuries>

327 3. Ahmed SK, Mohammed MG, Abdulqadir SO, El-Kader RGA, El-Shall NA, Chandran D, et al.  
328 Road traffic accidental injuries and deaths: A neglected global health issue. Health Science Reports  
329 2023;6(5):e1240.

330 4. Global status report on road safety 2023 [Internet]. Geneva: WHO; 2023 [cited 2024 Jan 30].  
331 Available from: [https://iris.who.int/bitstream/handle/10665/375016/9789240086517-](https://iris.who.int/bitstream/handle/10665/375016/9789240086517-eng.pdf?sequence=1)  
332 [eng.pdf?sequence=1](https://iris.who.int/bitstream/handle/10665/375016/9789240086517-eng.pdf?sequence=1)

333 5. Kazeem Y. Death rates from traffic accidents are higher in Africa than anywhere else  
334 [Internet]. World Economic Forum2019 [cited 2024 Jan 30];Available from:  
335 [https://www.weforum.org/agenda/2019/02/death-rates-from-traffic-accidents-are-higher-in-africa-](https://www.weforum.org/agenda/2019/02/death-rates-from-traffic-accidents-are-higher-in-africa-than-anywhere-else/)  
336 [than-anywhere-else/](https://www.weforum.org/agenda/2019/02/death-rates-from-traffic-accidents-are-higher-in-africa-than-anywhere-else/)

- 337 6. Bhalla K, Harrison J, Shahraz S, Abraham J, Bartels D, Yeh PH, et al. Burden of Road Injuries in  
338 Sub-Saharan Africa [Internet]. Baltimore, MD, USA: Department of Global Health and Population,  
339 Harvard School of Public Health, Boston, MA,; 2014. Available from:  
340 [africa.globalburdenofinjuries.org](http://africa.globalburdenofinjuries.org).
- 341 7. Decade of Action for Road Safety 2021-2030 [Internet]. 2021 [cited 2024 Jan 30];Available  
342 from: [https://www.who.int/teams/social-determinants-of-health/safety-and-mobility/decade-of-](https://www.who.int/teams/social-determinants-of-health/safety-and-mobility/decade-of-action-for-road-safety-2021-2030)  
343 [action-for-road-safety-2021-2030](https://www.who.int/teams/social-determinants-of-health/safety-and-mobility/decade-of-action-for-road-safety-2021-2030)
- 344 8. Wegman F, Berg HY, Cameron I, Thompson C, Siegrist S, Weijermars W. Evidence-based and  
345 data-driven road safety management. *IATSS Research* 2015;39(1):19–25.
- 346 9. Safety Data: Road Safety Manual - World Road Association (PIARC) [Internet]. Effective  
347 Management and Use of Safety Data2024 [cited 2024 Jan 31];Available from:  
348 <https://roadsafety.piarc.org/en/road-safety-management/safety-data>
- 349 10. Staton CA, De Silva V, Krebs E, Andrade L, Rulisa S, Mallawaarachchi BC, et al. High road  
350 utilizers surveys compared to police data for road traffic crash hotspot localization in Rwanda and Sri  
351 Lanka. *BMC Public Health* 2016;16:53.
- 352 11. Patel A, Krebs E, Andrade L, Rulisa S, Vissoci JRN, Staton CA. The epidemiology of road traffic  
353 injury hotspots in Kigali, Rwanda from police data. *BMC Public Health* 2016;16:697.
- 354 12. Muni KM, Ningwa A, Osuret J, Zziwa EB, Namatovu S, Biribawa C, et al. Estimating the  
355 burden of road traffic crashes in Uganda using police and health sector data sources. *Inj Prev*  
356 2020;[injuryprev–2020–043654](https://doi.org/10.1136/injury-2020-043654).
- 357 13. Neki K, Gutierrez H, Mitra S, Temesgen AM, Mbugua LW, Balasubramaniyan R, et al.  
358 Addressing discrepancies in estimates of road traffic deaths and injuries in Ethiopia. *Inj Prev*  
359 2023;29(3):234–40.

- 360 14. Chokotho LC, Matzopoulos R, Myers JE. Assessing quality of existing data sources on road  
361 traffic injuries (RTIs) and their utility in informing injury prevention in the Western Cape Province,  
362 South Africa. *Traffic Inj Prev* 2013;14(3):267–73.
- 363 15. Delaney PG, Eisner ZJ, Bamuleke R. Comparing Ugandan motorcycle taxi driver estimations  
364 of injury incidence to District-level injury surveillance data as a proxy to determine factors  
365 influencing risk perception. *Pan Afr Med J* 2022;41:177.
- 366 16. Motsumi MJ, Mashalla Y, Sebege M, Ho-Foster A, Motshome P, Mokokwe L, et al.  
367 Developing a trauma registry in a middle-income country - Botswana. *Afr J Emerg Med*  
368 2020;10(Suppl 1):S29–37.
- 369 17. Vissoci JRN, Shogilev DJ, Krebs E, Andrade LD, Vieira IF, Toomey N, et al. Road traffic injury in  
370 sub-Saharan African countries: A systematic review and summary of observational studies. *Traffic*  
371 *Injury Prevention* 2017;18(7):767–73.
- 372 18. Mwale M, Mwangilwa K, Kakoma E, Ilaych K. Estimation of the completeness of road traffic  
373 mortality data in Zambia using a three source capture recapture method. *Accident Analysis &*  
374 *Prevention* 2023;186:107048.
- 375 19. GRSF. Road Safety in Ethiopia: Traffic accidents, crash, fatalities & injury statistics [Internet].  
376 ROAD SAFETY COUNTRY PROFILE2016 [cited 2024 Jan 31];Available from:  
377 <https://www.roadsafetyfacility.org/country/ethiopia>
- 378 20. Abegaz T, Berhane Y, Worku A, Assrat A, Assefa A. Road traffic deaths and injuries are under-  
379 reported in Ethiopia: A capture-recapture method. *PLoS ONE* 2014;9(7).
- 380 21. Gautam P, Lisinge R, Bekele Y, Tulu GS, Tilahun G, Abegaz T. Road Safety Performance  
381 Review Ethiopia [Internet]. Addis Ababa, ET: United Nations Economic Commission for Africa; 2018.  
382 Available from: [https://unece.org/sites/default/files/2021-](https://unece.org/sites/default/files/2021-01/RSPR%20Ethiopia%20Report_Final%20web_1.pdf)  
383 [01/RSPR%20Ethiopia%20Report\\_Final%20web\\_1.pdf](https://unece.org/sites/default/files/2021-01/RSPR%20Ethiopia%20Report_Final%20web_1.pdf)

- 384 22. WRI. Ethiopia Saves Hundreds of Lives by Improving Road Safety [Internet]. Outcome2023  
385 [cited 2024 Jan 31];Available from: [https://www.wri.org/outcomes/ethiopia-saves-hundreds-lives-](https://www.wri.org/outcomes/ethiopia-saves-hundreds-lives-improving-road-safety)  
386 [improving-road-safety](https://www.wri.org/outcomes/ethiopia-saves-hundreds-lives-improving-road-safety)
- 387 23. Bank W. World Development Indicators: GDP growth (annual %) - Ethiopia [Internet].  
388 2020;Available from: <https://data.worldbank.org/indicator/NY.GDP.MKTP.KD.ZG?locations=ET>
- 389 24. WORLDHEALTHRANKINGS. ETHIOPIA: ROAD TRAFFIC ACCIDENTS. Ethiopia Health Profile  
390 [Internet] 2018;2022(Feb 02). Available from: [https://www.worldlifeexpectancy.com/ethiopia-road-](https://www.worldlifeexpectancy.com/ethiopia-road-traffic-accidents)  
391 [traffic-accidents](https://www.worldlifeexpectancy.com/ethiopia-road-traffic-accidents)
- 392 25. Data Analysis | Road Safety Manual - World Road Association (PIARC) [Internet]. [cited 2024  
393 Jan 31];Available from: [https://roadsafety.piarc.org/en/road-safety-management-safety-data/data-](https://roadsafety.piarc.org/en/road-safety-management-safety-data/data-analysis)  
394 [analysis](https://roadsafety.piarc.org/en/road-safety-management-safety-data/data-analysis)
- 395 26. Wegman F, Berg HY, Cameron I, Thompson C, Siegrist S, Weijermars W. An integrated group  
396 best-worst method – Data envelopment analysis approach for evaluating road safety: A case of Iran -  
397 ScienceDirect. IATSS Research 2015;39(1):19–25.
- 398 27. Awa Tiam, Ibrahima Gueye, Ahmed-Mouhamadou Wade, Samba Sidibe, Oumar Niang.  
399 Design and implementation of an offline-first road crash data collection system. World J Adv Res Rev  
400 2022;13(2):095–107.
- 401 28. Bonnet E, Nikiéma A, Traoré Z, Sidbega S, Ridde V. Technological solutions for an effective  
402 health surveillance system for road traffic crashes in Burkina Faso. Glob Health Action  
403 2017;10(1):1295698.
- 404 29. Imprialou M, Quddus M. Crash data quality for road safety research: Current state and  
405 future directions. Accident Analysis & Prevention 2019;130:84–90.
- 406 30. Sundet M, Mulima G, Kajombo C, Gjerde H, Christophersen AS, Madsen JE, et al.  
407 Geographical mapping of road traffic injuries in Lilongwe, Malawi. Injury 2021;52(4):806–13.

- 408 31. Dagenais C, Proulx M, Mc Sween-Cadieux E, Nikiema A, Bonnet E, Ridde V, et al.  
409 Collaborative research and knowledge translation on road crashes in Burkina Faso: the police  
410 perspective 18 months on. *Health Res Policy Syst* 2021;19(1):3.
- 411 32. Bonnet E, Lechat L, Ridde V. What interventions are required to reduce road traffic injuries  
412 in Africa? A scoping review of the literature. *PLoS One* 2018;13(11):e0208195.
- 413 33. Chokotho LC, Mulwafu W, Nyirenda M, Mbomuwa FJ, Pandit HG, Le G, et al. Establishment  
414 of trauma registry at Queen Elizabeth Central Hospital (QECH), Blantyre, Malawi and mapping of  
415 high risk geographic areas for trauma. *World J Emerg Med* 2019;10(1):33–41.
- 416 34. Radan B, Ogendi J, Charyk Stewart T, Shkrum M. Implementation of a road traffic crash  
417 injury surveillance tool in a trauma referral hospital in Kisumu City, Western Kenya: Lessons learned  
418 from the pilot study. *Traffic Inj Prev* 2022;23(sup1):S155–60.
- 419 35. World Bank Country and Lending Groups – World Bank Data Help Desk [Internet]. Data Help  
420 Desk2021 [cited 2024 Jan 10];Available from:  
421 <https://datahelpdesk.worldbank.org/knowledgebase/articles/906519>
- 422 36. Peters MDJ, Marnie C, Tricco AC, Pollock D, Munn Z, Alexander L, et al. Updated  
423 methodological guidance for the conduct of scoping reviews. *JBI Evidence Synthesis*  
424 2020;18(10):2119–26.
- 425 37. Tricco AC, Lillie E, Zarin W, O’Brien KK, Colquhoun H, Levac D, et al. PRISMA Extension for  
426 Scoping Reviews (PRISMA-ScR): Checklist and Explanation. *Ann Intern Med* 2018;169(7):467–73.
- 427 38. OSF | Experience and performance of road safety information management systems in sub-  
428 Saharan African countries: implication for policy and practice in Ethiopia: a scoping review [Internet].  
429 [cited 2024 Feb 2];Available from: <https://osf.io/6e2mx/>

- 430 39. Koster J. PubMed PubReMiner: a tool for PubMed query building and literature mining  
431 [Internet]. 2014 [cited 2024 Jan 11];Available from: [https://hgserver2.amc.nl/cgi-](https://hgserver2.amc.nl/cgi-bin/miner/miner2.cgi)  
432 [bin/miner/miner2.cgi](https://hgserver2.amc.nl/cgi-bin/miner/miner2.cgi)
- 433 40. Scells H, Zuccon G. searchrefiner: A Query Visualisation and Understanding Tool for  
434 Systematic Reviews [Internet]. In: Proceedings of the 27th ACM International Conference on  
435 Information and Knowledge Management. Torino Italy: ACM; 2018 [cited 2024 Jan 11]. page 1939–  
436 42.Available from: <https://dl.acm.org/doi/10.1145/3269206.3269215>
- 437 41. 2Dsearch [Internet]. [cited 2024 Jan 11];Available from: <https://app.2dsearch.com/>
- 438 42. Clark JM, Sanders S, Carter M, Honeyman D, Cleo G, Auld Y, et al. Improving the translation  
439 of search strategies using the Polyglot Search Translator: a randomized controlled trial. *jmla*  
440 [Internet] 2020 [cited 2024 Jan 11];108(2). Available from:  
441 <http://jmla.pitt.edu/ojs/jmla/article/view/834>
- 442 43. Zotero | Your personal research assistant [Internet]. [cited 2024 Jan 13];Available from:  
443 <https://www.zotero.org/>
- 444 44. Clark J, Glasziou P, Del Mar C, Bannach-Brown A, Stehlik P, Scott AM. A full systematic review  
445 was completed in 2 weeks using automation tools: a case study. *Journal of Clinical Epidemiology*  
446 2020;121:81–90.
- 447 45. Kitchenham B, Charters S. Parsifal [Internet]. 2020 [cited 2024 Jan 14];Available from:  
448 <https://parsif.al/about/>
- 449 46. DoocTools ExtractData 1.5 [Internet]. 2021;Available from:  
450 [http://www.wordaddins.com/products/extract-acronyms-bookmarks-tracked-changes-and-](http://www.wordaddins.com/products/extract-acronyms-bookmarks-tracked-changes-and-comments-from-word/)  
451 [comments-from-word/](http://www.wordaddins.com/products/extract-acronyms-bookmarks-tracked-changes-and-comments-from-word/)
- 452
